# Supplementary material for: Theoretical studies on the derivatives of tris([1,2,4]triazolo)[4,3-a:4′,3′-c:4′′,3′′-e][1,3,5]triazine as high energetic compounds
Source: Royal Society of Chemistry journal article supplement (doi:10.1039/c5ra22524h), 2016-01-01
Supplement: c5ra22524h1.pdf [file c5ra22524h1.pdf]

*Supporting information for*

**Theoretical studies on the derivatives of tris([1,2,4]triazolo)[4,3-a:4',3'-  
c:4'',3''-e][1,3,5]triazine as high energetic compounds**

Qun Zeng, Yanyang Qu, Jinshan Li and Hui Huang\*

*Institute of Chemical Materials, China Academy of Engineering Physics (CAEP), Mianyang, 621900, China*

**Table S1** The bond order for TTT and its derivatives with NBO.

|         | TTT   | R=NO <sub>2</sub> | R=NH <sub>2</sub> | R=NHNO <sub>2</sub> | R=N <sub>3</sub> |
|---------|-------|-------------------|-------------------|---------------------|------------------|
| N1–N2   | 1.206 | 1.214             | 1.154             | 1.206               | 1.179            |
| N2=C3   | 1.683 | 1.661             | 1.570             | 1.622               | 1.581            |
| C3–N4   | 1.090 | 1.076             | 1.056             | 1.067               | 1.069            |
| N4–C5   | 1.098 | 1.091             | 1.064             | 1.095               | 1.073            |
| C5=N1   | 1.609 | 1.610             | 1.647             | 1.608               | 1.638            |
| C4–N6   | 1.014 | 1.008             | 1.011             | 1.011               | 1.007            |
| C3–R    | 0.909 | 0.882             | 1.165             | 1.044               | 1.091            |
| R (N-N) |       |                   |                   | 0.949               | 1.376            |

---

\* Corresponding Author  
E-mail: huangh0816@sina.com

Table S2. The detonation velocity ( $D$ , in km/s) and pressure ( $P$ , in GPa) of the title compounds, TNT, HMX and CL-20.

| Compound           | $D$    |         | $P$    |         |
|--------------------|--------|---------|--------|---------|
|                    | $\rho$ | $\rho'$ | $\rho$ | $\rho'$ |
| TTT                | 8.15   | 7.66    | 20.51  | 20.07   |
| 1                  | 10.55  | 9.27    | 38.57  | 36.82   |
| 2                  | 9.34   | 8.08    | 22.78  | 21.65   |
| 3                  | 9.40   | 9.02    | 34.78  | 34.27   |
| 4                  | 8.60   | 8.71    | 29.22  | 29.34   |
| TNT <sup>a</sup>   | 6.95   |         | 19.00  |         |
| HMX <sup>a</sup>   | 9.10   |         | 39.30  |         |
| CL-20 <sup>a</sup> | 9.38   |         | 44.10  |         |

<sup>a</sup> Experimental values from *Cent. Eur. J. Energ. Mater.*, 2011, 8, 209-220.

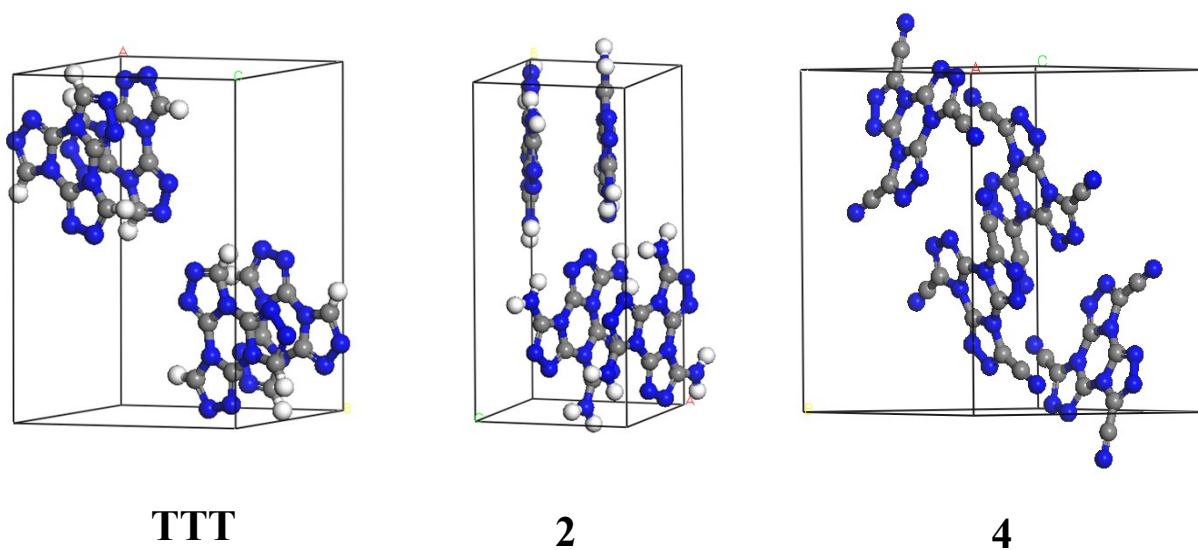

**Fig.S1** The predicted cell structures of compound TTT, 2 and 4.

Listing XYZ coordinates of TTT and its derivatives in Å

**TTT**

|   |             |             |            |
|---|-------------|-------------|------------|
| C | 1.21347700  | 0.68937300  | 0.00000000 |
| N | 0.00000000  | 1.35800500  | 0.00000000 |
| N | 1.17606700  | -0.67900200 | 0.00000000 |
| C | -0.00972400 | -1.39558800 | 0.00000000 |
| N | -1.17606700 | -0.67900200 | 0.00000000 |
| C | -1.20375300 | 0.70621500  | 0.00000000 |
| C | -0.35986100 | 2.68643300  | 0.00000000 |
| N | -1.65044300 | 2.79183200  | 0.00000000 |
| N | -2.19846900 | 1.52447800  | 0.00000000 |
| C | -2.14658900 | -1.65486500 | 0.00000000 |
| N | -1.59257600 | -2.82524200 | 0.00000000 |
| N | -0.22100200 | -2.66616900 | 0.00000000 |
| C | 2.50644900  | -1.03156800 | 0.00000000 |
| N | 3.24301900  | 0.03340900  | 0.00000000 |
| N | 2.41947100  | 1.14169100  | 0.00000000 |
| H | 2.83775900  | -2.05516800 | 0.00000000 |
| H | -3.19870700 | -1.42998700 | 0.00000000 |
| H | 0.36094800  | 3.48515500  | 0.00000000 |

1

|   |             |             |             |
|---|-------------|-------------|-------------|
| N | 3.54881200  | 1.46757000  | 0.06018500  |
| O | 4.26212000  | 2.16900300  | -0.60118300 |
| O | 3.86101800  | 0.62118000  | 0.86130600  |
| N | -3.04535900 | 2.33957600  | 0.06018500  |
| O | -2.46846700 | 3.03315000  | 0.86130600  |
| O | -4.00947100 | 2.60660300  | -0.60118300 |
| C | 0.00000000  | 1.40074700  | 0.00073100  |
| N | -1.18329500 | 0.67414300  | 0.06412100  |
| N | 1.17547200  | 0.68769200  | 0.06412100  |
| C | 1.21308300  | -0.70037400 | 0.00073100  |
| N | 0.00782300  | -1.36183500 | 0.06412100  |
| C | -1.21308300 | -0.70037400 | 0.00073100  |
| C | -2.51489700 | 0.98513300  | -0.08080400 |
| N | -3.23816000 | -0.06989100 | -0.20067200 |
| N | -2.40751200 | -1.16039400 | -0.15228300 |
| C | 0.40429800  | -2.67053100 | -0.08080400 |
| N | 1.67960700  | -2.76938300 | -0.20067200 |
| N | 2.20868700  | -1.50476900 | -0.15228300 |
| C | 2.11059900  | 1.68539800  | -0.08080400 |
| N | 1.55855300  | 2.83927400  | -0.20067200 |
| N | 0.19882500  | 2.66516300  | -0.15228300 |
| N | -0.50345300 | -3.80714600 | 0.06018500  |
| O | -1.39255200 | -3.65433000 | 0.86130600  |
| O | -0.25264900 | -4.77560600 | -0.60118300 |

2

|   |             |             |             |
|---|-------------|-------------|-------------|
| C | 1.29663400  | 0.53182500  | -0.04365600 |
| N | 0.17659000  | 1.34497500  | -0.06945000 |
| N | 1.07648700  | -0.82541800 | -0.06945000 |
| C | -0.18774300 | -1.38883100 | -0.04365600 |
| N | -1.25307700 | -0.51955600 | -0.06945000 |
| C | -1.10889100 | 0.85700600  | -0.04365600 |
| C | 0.00000000  | 2.71013300  | 0.00355400  |
| N | -1.26953400 | 2.99385100  | 0.06331600  |
| N | -1.97922200 | 1.79444300  | 0.03196600  |
| C | -2.34704400 | -1.35506600 | 0.00355400  |
| N | -1.95798400 | -2.59637400 | 0.06331600  |
| N | -0.56442200 | -2.61127800 | 0.03196600  |
| C | 2.34704400  | -1.35506600 | 0.00355400  |
| N | 3.22751700  | -0.39747700 | 0.06331600  |
| N | 2.54364500  | 0.81683500  | 0.03196600  |
| N | 1.05994700  | 3.55588100  | -0.05285200 |
| N | 2.54951000  | -2.69588100 | -0.05285200 |
| N | -3.60945700 | -0.86000000 | -0.05285200 |
| H | 1.96217700  | 3.17024100  | 0.18715900  |
| H | 0.87186500  | 4.49878300  | 0.24259600  |
| H | 1.76442100  | -3.28441600 | 0.18715900  |
| H | 3.46012700  | -3.00444900 | 0.24259600  |
| H | -3.72659800 | 0.11417500  | 0.18715900  |
| H | -4.33199300 | -1.49433400 | 0.24259600  |

3

|   |             |             |             |
|---|-------------|-------------|-------------|
| C | -1.21558400 | 0.69174600  | -0.48597200 |
| N | 0.00000000  | 1.35578600  | -0.46447400 |
| N | -1.17414500 | -0.67789300 | -0.46447400 |
| C | 0.00872200  | -1.39860000 | -0.48597200 |
| N | 1.17414500  | -0.67789300 | -0.46447400 |
| C | 1.20686100  | 0.70685400  | -0.48597200 |
| C | 0.36828100  | 2.68138000  | -0.48624500 |
| N | 1.65777300  | 2.78888200  | -0.53443900 |
| N | 2.20091500  | 1.52562000  | -0.54499500 |
| C | 2.13800300  | -1.65963000 | -0.48624500 |
| N | 1.58635600  | -2.83011400 | -0.53443900 |
| N | 0.22076800  | -2.66885900 | -0.54499500 |
| C | -2.50628300 | -1.02175000 | -0.48624500 |
| N | -3.24412900 | 0.04123300  | -0.53443900 |
| N | -2.42168400 | 1.14323900  | -0.54499500 |
| N | -0.55254700 | 3.71468800  | -0.54898100 |
| N | -2.94074000 | -2.33586300 | -0.54898100 |
| N | 3.49328700  | -1.37882400 | -0.54898100 |
| H | -0.22575000 | 4.57633800  | -0.96811100 |
| N | -1.26523300 | 4.00308700  | 0.63655100  |
| H | -3.85035000 | -2.48367400 | -0.96811100 |
| N | -2.83415800 | -3.09726700 | 0.63655100  |
| H | 4.07610000  | -2.09266400 | -0.96811100 |
| N | 4.09939100  | -0.90581900 | 0.63655100  |
| O | -1.78580700 | 5.08214400  | 0.65949500  |
| O | -1.29798000 | 3.13485600  | 1.46497700  |
| O | 5.29416900  | -0.99451800 | 0.65949500  |
| O | 3.36385500  | -0.44334500 | 1.46497700  |
| O | -2.06587600 | -2.69151200 | 1.46497700  |
| O | -3.50836300 | -4.08762600 | 0.65949500  |

4

|   |             |             |            |
|---|-------------|-------------|------------|
| N | 2.88114300  | -2.34979900 | 0.00000000 |
| N | 0.59441400  | 3.67004200  | 0.00000000 |
| C | 1.22040900  | 0.69803400  | 0.00000000 |
| N | 0.00000000  | 1.36012600  | 0.00000000 |
| N | 1.17790400  | -0.68006300 | 0.00000000 |
| C | -0.00568900 | -1.40592200 | 0.00000000 |
| N | -1.17790400 | -0.68006300 | 0.00000000 |
| C | -1.21472000 | 0.70788800  | 0.00000000 |
| C | -0.37039800 | 2.68446400  | 0.00000000 |
| N | -1.66310700 | 2.79593800  | 0.00000000 |
| N | -2.20615500 | 1.52466200  | 0.00000000 |
| C | -2.13961500 | -1.66300600 | 0.00000000 |
| N | -1.58979900 | -2.83826200 | 0.00000000 |
| N | -0.21731900 | -2.67291800 | 0.00000000 |
| C | 2.51001300  | -1.02145800 | 0.00000000 |
| N | 3.25290700  | 0.04232500  | 0.00000000 |
| N | 2.42347400  | 1.14825500  | 0.00000000 |
| N | -3.47555700 | -1.32024300 | 0.00000000 |
| N | -4.23407400 | -2.30783900 | 0.00000000 |
| N | 0.11839000  | 4.82073500  | 0.00000000 |
| N | 4.11568400  | -2.51289600 | 0.00000000 |
| N | 5.19190500  | -2.78253300 | 0.00000000 |
| N | -5.00569700 | -3.10505600 | 0.00000000 |
| N | -0.18620900 | 5.88758800  | 0.00000000 |
